# Supplementary material
Source: bioRxiv or medRxiv preprint supplement (https://www.biorxiv.org/highwire/filestream/36829/field_highwire_adjunct_files/2/046946-3.pdf)
Supplement: Supplementary file [file 046946-3.pdf]

1 Supporting Information to the paper Zelený, D. Bias in community-weighted mean analysis of  
2 plant functional traits and species indicator values. *Journal of Vegetation Science*.

### 3 **Appendix S3. Evaluation of permutation tests using 1D simulated** 4 **community data set from Dray & Legendre (2008)**

#### 5 **Introduction**

6 Additionally to 2D simulated community data set, I used also the simulated data set created  
7 by the algorithm introduced by Dray & Legendre (2008) to evaluate the performance of  
8 various permutation tests in the weighted-mean approach. This algorithm generates matrices  
9 **R**, **L** and **Q** using five scenarios with various combinations of links between individual  
10 matrices: scenario 1 with both **R** and **Q** linked to **L**, scenario 1N identical to scenario 1 with  
11 added normal random noise, scenario 2 with **R** linked to **L**, but **Q** not linked to **L**, scenario 3  
12 with **R** not linked to **L**, but **Q** linked to **L**, and scenario 4 with no links between matrices. For  
13 each scenario (except 1N) I generated 1000 simulated data sets, and used each data set to  
14 calculate weighted mean of species attributes and to correlate these weighted mean with  
15 sample attributes (using Pearson's *r* correlation coefficient). The significance of correlation  
16 was tested using *standard permutation test*, *modified permutation test* and *sequential*  
17 *permutation test based on the fourth-corner statistic*. Additionally, using this simulated  
18 community data sets, I conducted also a power analysis to compare the power of modified  
19 permutation tests to sequential test based on the fourth-corner statistic.

20

#### 21 **Methods of simulation study**

22 The simulated community data sets according to Dray & Legendre (2008) are constructed in  
23 the following way (simplified): matrix **R** contains one randomly generated variable with  
24 uniform distribution, representing sample attributes, while matrix **Q** contains one randomly

25 generated variable with uniform distribution representing species attributes. To make species  
26 and sample attributes linked via species composition, matrix **L** is constructed from both  
27 sample and species attributes in a way that the response of individual species abundances to  
28 the environmental gradient is modelled as symmetric Gaussian curve with the optima  
29 equivalent to species attributes generated in matrix **Q** and species tolerance generated as  
30 random value with mean  $\mu_{tol}$ . The abundance of given species in particular sample is then  
31 derived as the probability of species occurrence at particular value of environmental gradient  
32 (given by the sample attribute in **R**) based on constructed species response curve. For  
33 technical details, see the original description in Dray & Legendre (2008). In this study, the  
34 simulation algorithm was implemented into the *weimea* package (Appendix S5) as the  
35 function *simul.RLQ*.

36 I created five scenarios introduced for analogical purpose in the context of the fourth-corner  
37 analysis by Dray & Legendre (2008), differing from each other by the null hypothesis being  
38 tested and numbered here identically to the original study. In *scenario 1*, all three matrices (**R**,  
39 **L** and **Q**) are linked together by the mechanism of the simulation model described above. In  
40 *scenario 1N*, normal noise was added to results of scenario 1 to increase the beta diversity of  
41 compositional matrix **L** and to reduce the intensity of link between **R** or **Q** and **L**. This was  
42 done by adding normal random value of mean 5 and standard deviation 1 to **R** and **Q**, and  
43 normal random value of mean 0 and standard deviation 2 to values in matrix **L** (negative  
44 values, which occurred in **L** after adding the random values, were replaced by zero). In  
45 *scenario 2*, species composition (**L**) is linked to sample attributes (**R**), but not to species  
46 attributes (**Q**). Matrices were created as in scenario 1, and afterwards the rows with species  
47 attributes in matrix **Q** were permuted (cancelling the link between **L** and **Q**). In *Scenario 3*,  
48 species composition (**L**) is linked to species attributes (**Q**), but not to sample attributes (**R**).  
49 Matrices were created as in scenario 1, and afterwards rows with sample attributes in matrix

50 **R** were permuted (this cancels the link between **L** and **R**). Finally, in *scenario 4*, there is no  
51 link between **L** and **Q**, neither between **L** and **R**. Matrices were created as in scenario 1, and  
52 afterwards the rows in both matrices **R** and **Q** were permuted, cancelling all links between  
53 matrices.

54 Three additional parameters can be modified within each scenario: average species  
55 niche width ( $\mu_{tol}$ ), the number of samples ( $n$ ) and the number of species in the data set ( $p$ ). To  
56 evaluate applicability of results in case of communities shaped predominantly by specialists  
57 or generalists and data sets of different size, I calculated each scenario for three values of the  
58 average species tolerances ( $\mu_{tol} = \{10, 30, 60\}$ ), three sample sizes ( $n = \{30, 50, 100\}$ ) and  
59 three sizes of the species pool ( $p = \{30, 50, 100\}$ ). For each scenario (except scenario 1N) and  
60 each combination of three additional parameters I created 1000 artificial data sets, and for  
61 each data set I calculated Pearson's  $r$  correlation coefficient between the community-weighted  
62 mean of species attributes and sample attributes. The significance of each correlation was  
63 tested using standard and modified permutation test and the proportion of results significant at  
64  $\alpha = 0.05$  was calculated.

65 To evaluate the power of individual permutation tests in more detail, I performed  
66 power analysis analogous to that on Fig. 4 of Dray & Legendre (2008). Using only scenario  
67 1N, I created the first set of simulated data sets with different number of species (10 to 100,  
68 step 10) and different number of samples (10 to 100, step 10) while keeping the average  
69 species tolerances constant ( $\mu_{tol} = 30$ ). Additionally, to see also relationship between test  
70 power and beta diversity of the data set (modified by changing the niche width of simulated  
71 species), I created also the second set of simulated data sets, with the number of species either  
72 30, 50, or 100, and the number of samples either 30, 50 or 100, and varying the average  
73 species tolerances ( $\mu_{tol}$ ) from 10 to 80 (with step 10). For each combination of the number of  
74 species, the number of samples and species tolerance, I created 1000 simulated data sets,

75 performed modified permutation test and sequential permutation test based on the fourth-  
76 corner statistic, and counted the number of significant results ( $\alpha = 0.05$ ).

77

## 78 **Results of the simulation study**

79 Standard permutation test has inflated Type I error rate for scenario 2 and correct rates for  
80 scenarios 3 and 4 (Appendix S3: Table S1). Modified permutation test has correct rate for  
81 scenarios 2 and 4, and overly conservative rate for scenario 3 (almost no significant results).  
82 Note, however, that community data simulated by 1D algorithm are more homogeneous than  
83 those of 2D one. Even the most heterogeneous 1D data set has an average beta diversity 0.413  
84 ( $\mu_{\text{tol}} = 10$ , number of species 30 and number of sites 30, see Appendix S3: Table S2), while  
85 the most homogeneous 2D data set has average beta diversity 0.621 (Appendix S1: Table S1).

86         The power of the standard permutation test (measured by rejection rate for scenario 1,  
87 for which the null hypothesis is true) is high for all data set sizes and both narrow and wide  
88 species niches (being 1.000 in all cases, Appendix S3: Table S1). In the case of modified  
89 permutation test, the power is high for simulation model with narrow species niches even for  
90 smaller data sets. In the case of wider species niches, the power of the test is lower, and is  
91 further decreasing with decreasing size of the data set (number of species or number of sites).  
92 The lowest power recorded, 0.545, is for the scenario with the widest species niches and  
93 lowest numbers of species and sites ( $\mu_{\text{tol}} = 60$ , number of species 30 and number of sites 30;  
94 Appendix S3: Table S1).

95         Detailed power analysis based on the data set with added normal noise (scenario 1N)  
96 (with  $\mu_{\text{tol}} = 30$  and the numbers of species and samples ranging from 10 to 100) show that  
97 both modified permutation test and sequential permutation test with the fourth-corner statistic  
98 has similar power. The power decreases with decreasing number of species and samples in the

99 data set (Appendix S3: Figs. S1a, c), and also with decreasing beta diversity (Appendix S3:  
100 Fig. S1b, d; note that in 1D algorithm, the beta diversity decreases with increasing species  
101 tolerance).

## 102 **References**

103 Dray, S. & Legendre P. 2008. Testing the species traits-environment relationships: the fourth-  
104 corner problem revisited. *Ecology* 89: 3400–3412.

105 ter Braak, C.J.F., Cormont, A. & Dray, S. 2012. Improved testing of species traits-  
106 environment relationships in the fourth-corner problem. *Ecology* 93: 1525–1526.

107

108 **Appendix S3: Table S1**

109 Evaluation of standard and modified permutation test examining the relationship of weighted  
 110 mean of species attributes with sample attributes, based on the simulation study designed  
 111 according to 1D simulated model of Dray & Legendre (2008). The simulation varies three  
 112 parameters: the average simulated species niche width ( $\mu_{tol}$ ), the number of sites in the data set  
 113 (# of sites) and the number of species in the data set (# of species). Rejection rates represent  
 114 the proportion of significant results at  $\alpha = 0.05$  (using 1000 simulated data sets). In scenario 1,  
 115 all three matrices (**R**, **L** and **Q**) are linked together (this represents the power test for both  
 116 standard and modified permutation test). In scenario 2, **R** is linked to **L**, but **Q** is not linked to  
 117 **L**, while in scenario 3 **Q** is linked to **L** but **R** is not linked to **L**. In scenario 4, both **R** and **Q**  
 118 are not linked to **L**. The bold numbers are those used on Appendix S3: Fig. S2.

| $\mu_{tol}$ | # of sites | # of species | Rejection rate for individual scenarios |                |                |                |                           |                |                |                |
|-------------|------------|--------------|-----------------------------------------|----------------|----------------|----------------|---------------------------|----------------|----------------|----------------|
|             |            |              | Standard permutation test               |                |                |                | Modified permutation test |                |                |                |
|             |            |              | Scenari<br>o 1                          | Scenari<br>o 2 | Scenari<br>o 3 | Scenari<br>o 4 | Scenari<br>o 1            | Scenari<br>o 2 | Scenari<br>o 3 | Scenari<br>o 4 |
| 10          | 30         | 30           | 1.000                                   | 0.750          | 0.047          | 0.059          | 0.999                     | 0.039          | 0.008          | 0.038          |
| 10          | 30         | 50           | 1.000                                   | 0.762          | 0.051          | 0.049          | 1.000                     | 0.049          | 0.007          | 0.044          |
| 10          | 30         | 100          | 1.000                                   | 0.711          | 0.049          | 0.061          | 1.000                     | 0.042          | 0.003          | 0.066          |
| 10          | 50         | 30           | 1.000                                   | 0.803          | 0.047          | 0.046          | 1.000                     | 0.051          | 0.007          | 0.043          |
| 10          | 50         | 50           | 1.000                                   | 0.799          | 0.047          | 0.051          | 1.000                     | 0.043          | 0.004          | 0.049          |
| 10          | 50         | 100          | 1.000                                   | 0.808          | 0.051          | 0.040          | 1.000                     | 0.057          | 0.004          | 0.044          |
| 10          | 100        | 30           | 1.000                                   | 0.864          | 0.045          | 0.046          | 1.000                     | 0.053          | 0.003          | 0.031          |
| 10          | 100        | 50           | 1.000                                   | 0.845          | 0.053          | 0.043          | 1.000                     | 0.046          | 0.004          | 0.039          |
| 10          | 100        | 100          | 1.000                                   | 0.861          | 0.043          | 0.044          | 1.000                     | 0.050          | 0.001          | 0.049          |
| 30          | 30         | 30           | 1.000                                   | 0.862          | 0.052          | 0.050          | 0.894                     | 0.054          | 0.001          | 0.054          |
| 30          | 30         | 50           | 1.000                                   | 0.872          | 0.058          | 0.049          | 0.969                     | 0.066          | 0.001          | 0.049          |
| 30          | 30         | 100          | 1.000                                   | 0.888          | 0.055          | 0.045          | 0.999                     | 0.048          | 0.002          | 0.043          |
| 30          | 50         | 30           | 1.000                                   | 0.913          | 0.043          | 0.035          | 0.918                     | 0.055          | 0.002          | 0.047          |
| 30          | 50         | 50           | 1.000                                   | 0.904          | 0.056          | 0.054          | 0.989                     | 0.051          | 0.000          | 0.049          |
| 30          | 50         | 100          | 1.000                                   | 0.904          | 0.053          | 0.047          | 0.999                     | 0.049          | 0.000          | 0.042          |
| 30          | 100        | 30           | 1.000                                   | 0.931          | 0.040          | 0.049          | 0.908                     | 0.051          | 0.000          | 0.046          |
| 30          | 100        | 50           | 1.000                                   | 0.922          | 0.035          | 0.052          | 0.978                     | 0.056          | 0.000          | 0.044          |
| <b>30</b>   | <b>100</b> | <b>100</b>   | <b>1.000</b>                            | <b>0.935</b>   | <b>0.062</b>   | <b>0.046</b>   | <b>0.999</b>              | <b>0.049</b>   | <b>0.001</b>   | <b>0.051</b>   |
| 60          | 30         | 30           | 1.000                                   | 0.961          | 0.045          | 0.047          | 0.554                     | 0.055          | 0.000          | 0.051          |
| 60          | 30         | 50           | 1.000                                   | 0.968          | 0.055          | 0.047          | 0.717                     | 0.037          | 0.000          | 0.053          |
| 60          | 30         | 100          | 1.000                                   | 0.957          | 0.057          | 0.057          | 0.852                     | 0.057          | 0.000          | 0.059          |
| 60          | 50         | 30           | 1.000                                   | 0.970          | 0.050          | 0.048          | 0.547                     | 0.055          | 0.000          | 0.057          |
| 60          | 50         | 50           | 1.000                                   | 0.968          | 0.041          | 0.045          | 0.710                     | 0.045          | 0.000          | 0.052          |
| 60          | 50         | 100          | 1.000                                   | 0.976          | 0.051          | 0.057          | 0.867                     | 0.061          | 0.000          | 0.046          |
| 60          | 100        | 30           | 1.000                                   | 0.979          | 0.042          | 0.048          | 0.530                     | 0.046          | 0.001          | 0.040          |
| 60          | 100        | 50           | 1.000                                   | 0.973          | 0.051          | 0.037          | 0.704                     | 0.044          | 0.003          | 0.059          |
| 60          | 100        | 100          | 1.000                                   | 0.980          | 0.041          | 0.045          | 0.863                     | 0.039          | 0.000          | 0.054          |

120 **Appendix S3: Table S2**

121 Beta diversity of the matrix of species composition for each combination of species tolerance  
 122  $\times$  number of sites  $\times$  number of species in the 1D simulation model of Dray & Legendre  
 123 (2008), calculated as a variation in the dissimilarity matrix with squared values of Whittaker's  
 124 index of association among samples. Beta diversity is reported separately for scenarios  
 125 without added noise (scenarios 1, 2, 3 and 4) and with added normal random noise (scenario  
 126 1N). The simulation varies three parameters: the average simulated species niche width ( $\mu_{tol}$ ),  
 127 the number of sites in the data set (# of sites) and the number of species in the data set (# of  
 128 species). The bold numbers are beta diversities of the data set for the combination of  
 129 parameters used on Appendix S3: Fig. S2.

| $\mu_{tol}$ | # of sites | # of species | Beta diversity of matrix <b>L</b> for scenarios 1, 2, 3, 4 | Beta diversity of matrix <b>L</b> for scenario 1N |
|-------------|------------|--------------|------------------------------------------------------------|---------------------------------------------------|
| 10          | 30         | 30           | 0.413±0.065                                                | 0.475±0.018                                       |
| 10          | 30         | 50           | 0.410±0.053                                                | 0.471±0.014                                       |
| 10          | 30         | 100          | 0.408±0.041                                                | 0.468±0.009                                       |
| 10          | 50         | 30           | 0.409±0.061                                                | 0.474±0.014                                       |
| 10          | 50         | 50           | 0.409±0.048                                                | 0.471±0.011                                       |
| 10          | 50         | 100          | 0.407±0.038                                                | 0.467±0.007                                       |
| 10          | 100        | 30           | 0.409±0.054                                                | 0.474±0.010                                       |
| 10          | 100        | 50           | 0.412±0.045                                                | 0.470±0.007                                       |
| 10          | 100        | 100          | 0.408±0.033                                                | 0.468±0.006                                       |
| 30          | 30         | 30           | 0.141±0.032                                                | 0.433±0.017                                       |
| 30          | 30         | 50           | 0.140±0.028                                                | 0.429±0.013                                       |
| 30          | 30         | 100          | 0.141±0.024                                                | 0.427±0.010                                       |
| 30          | 50         | 30           | 0.139±0.030                                                | 0.433±0.014                                       |
| 30          | 50         | 50           | 0.140±0.025                                                | 0.430±0.011                                       |
| 30          | 50         | 100          | 0.140±0.020                                                | 0.428±0.008                                       |
| 30          | 100        | 30           | 0.140±0.029                                                | 0.434±0.010                                       |
| 30          | 100        | 50           | 0.141±0.024                                                | 0.430±0.008                                       |
| <b>30</b>   | <b>100</b> | <b>100</b>   | <b>0.142±0.017</b>                                         | <b>0.427±0.005</b>                                |
| 60          | 30         | 30           | 0.019±0.005                                                | 0.400±0.017                                       |
| 60          | 30         | 50           | 0.020±0.005                                                | 0.396±0.013                                       |
| 60          | 30         | 100          | 0.019±0.004                                                | 0.394±0.009                                       |
| 60          | 50         | 30           | 0.019±0.005                                                | 0.400±0.013                                       |
| 60          | 50         | 50           | 0.019±0.004                                                | 0.397±0.010                                       |
| 60          | 50         | 100          | 0.019±0.003                                                | 0.394±0.007                                       |
| 60          | 100        | 30           | 0.019±0.005                                                | 0.399±0.009                                       |
| 60          | 100        | 50           | 0.019±0.004                                                | 0.396±0.007                                       |
| 60          | 100        | 100          | 0.019±0.003                                                | 0.394±0.005                                       |

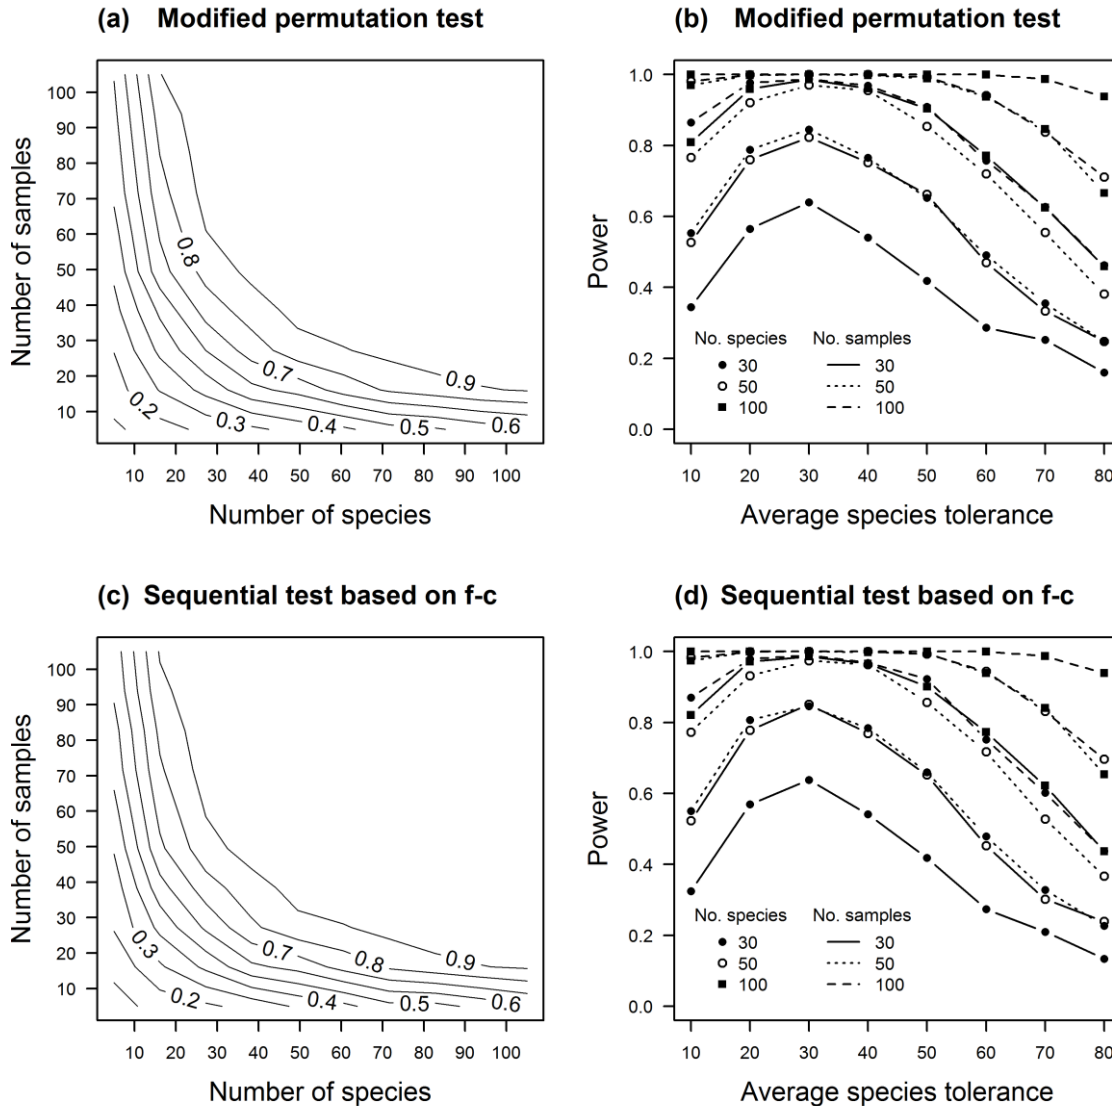

132

133 **Appendix S3: Figure S1**

134 The detailed power analysis of modified permutation test (a, b) and sequential permutation  
 135 test based on the fourth-corner statistic (c, d). Panels (a) and (c) show the dependence of the  
 136 power (contour) on given combination of the number of species (x-axis) and the number of  
 137 samples (y-axis), all with fixed  $\mu_{tol} = 30$ . Panels (b) and (d) show dependence of power (y-  
 138 axis) on species tolerance ( $\mu_{tol}$ , ranging from 10 to 80) for a given combination of the number  
 139 of species and the number of samples. Power is expressed as the proportion of results  
 140 significant at  $\alpha = 0.05$  from 1000 simulated data sets based on scenario 1N from Dray &  
 141 Legendre (2008).

142



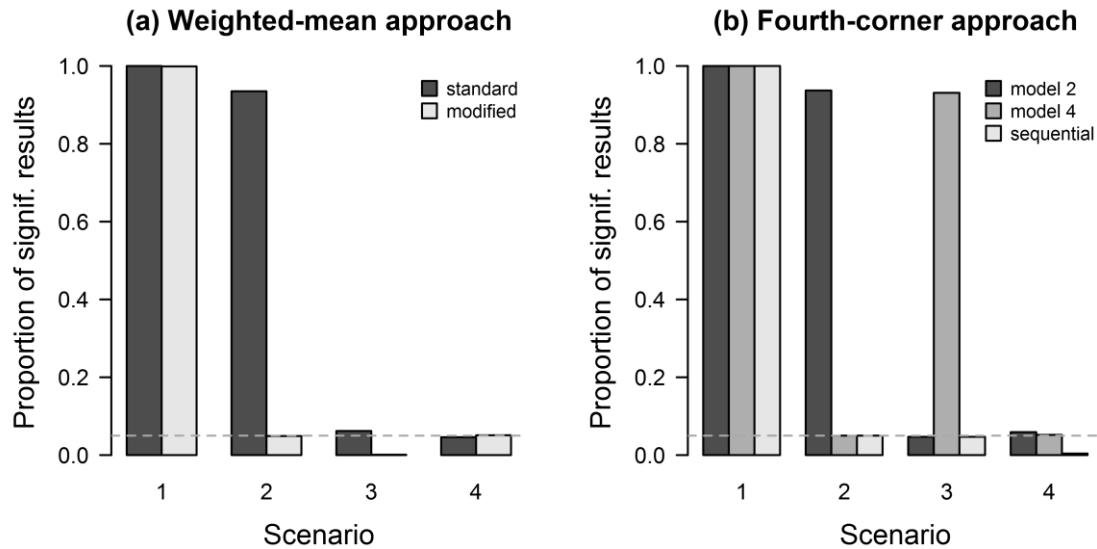

143

144 **Appendix S3: Figure S2**

145 Comparison of permutation tests used in (a) weighted-mean approach with Pearson's  
 146 correlation, and (b) the fourth-corner approach. Based on simulated community data sets  
 147 according to 1D simulated model of Dray & Legendre (2008), using 1000 simulated data sets  
 148 with  $\mu_{tol} = 30$ , the number of species  $p = 100$  and the number of samples  $n = 100$ . The  
 149 proportion of significant results represents the rejection rate at  $\alpha = 0.05$  for standard and  
 150 modified permutation test in weighted-mean approach and model 2, model 4 and sequential  
 151 permutation test in the fourth-corner approach. The values in the barplot for the fourth-corner  
 152 approach (panel b) are from Table 1 in Dray & Legendre (2008) for model 2 and model 4  
 153 tests, and from Table A1 in ter Braak et al. (2012) for the sequential permutation test.
